# Supplementary material for: Bilayer hydrogel dressing with lysozyme-enhanced photothermal therapy for biofilm eradication and accelerated chronic wound repair
Source: PubMed Central journal article supplement — Acta Pharm Sin B. 2022 Apr 5;13(1):284–97. doi: 10.1016/j.apsb.2022.03.024 (PMC9939289; doi:10.1016/j.apsb.2022.03.024), 2022-04-05
Supplement: mmc1.pdf [file mmc1.pdf]

## Supporting Information for

## ORIGINAL ARTICLE

# **Bilayer hydrogel dressing with lysozyme-enhanced photothermal therapy for biofilm eradication and accelerated chronic wound repair**

**Yizhen Wang<sup>a,†</sup>, Qijun Lv<sup>a,†</sup>, You Chen<sup>b</sup>, Langtao Xu<sup>b</sup>, Miao Feng<sup>b</sup>, Zhiyong Xiong<sup>a</sup>, Jiajun Li<sup>a</sup>, Jie Ren<sup>c,\*</sup>, Jie Liu<sup>b,\*</sup>, Bo Liu<sup>a,\*</sup>**

*<sup>a</sup>Department of General Surgery, the Third Affiliated Hospital of Sun Yat-sen University, Guangzhou 510630, China*

*<sup>b</sup>School of Biomedical Engineering, Sun Yat-sen University, Guangzhou 510006, China*

*<sup>c</sup>Department of Ultrasound, the Third Affiliated Hospital of Sun Yat-sen University, Guangzhou 510630, China*

Received 29 January 2022; received in revised form 24 February 2022; accepted 15 March 2022

\*Corresponding authors. Tel./fax: +86 20 82179243 (Jie Ren); +86 20 39332145 (Jie Liu); +86 20 82179742 (Bo Liu).

E-mail addresses: renj@mail.sysu.edu.cn (Jie Ren), liujie56@mail.sysu.edu.cn (Jie Liu), liubo3@mail.sysu.edu.cn (Bo Liu).

<sup>†</sup>These authors made equal contributions to this work.

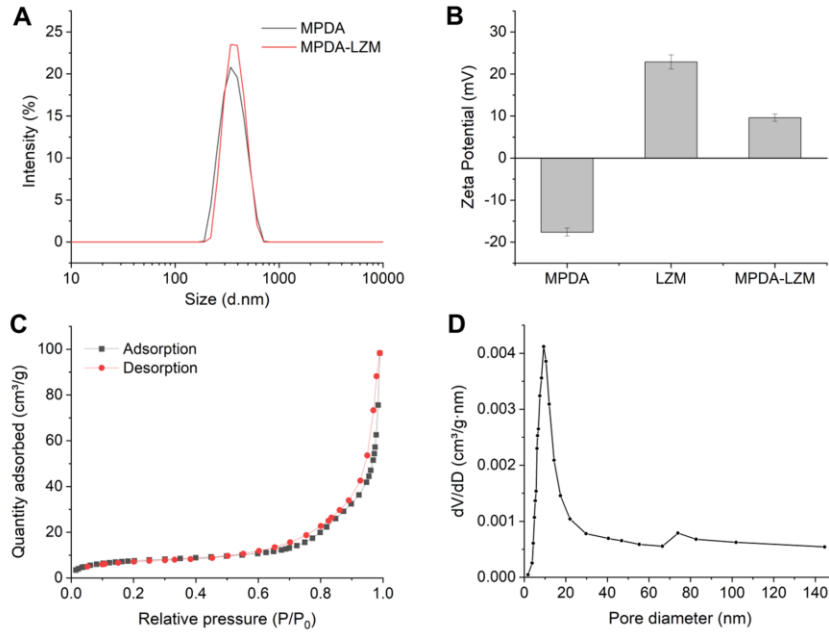

**Figure S1** (A) Hydrodynamic size distributions of MPDA nanoparticles and MPDA-LZM nanoparticles. (B) Zeta potentials of MPDA, LZM, and MPDA-LZM ( $n=3$ ). (C)  $N_2$  adsorption-desorption isotherms and (D) pore size distribution of MPDA nanoparticles.

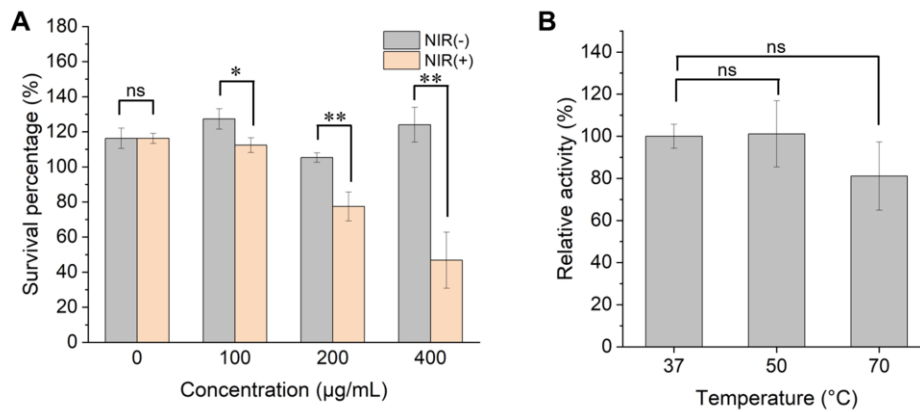

**Figure S2** (A) Survival percentages of *E. coli* treated with different concentrations of MPDA-LZM nanoparticles ( $n=3$ ). (B) Relative activity of lysozyme after incubation for 2 h at different temperatures (37, 50 and 70 °C) ( $n=3$ ,  $*P < 0.05$ ,  $**P < 0.01$ , ns: not significant).

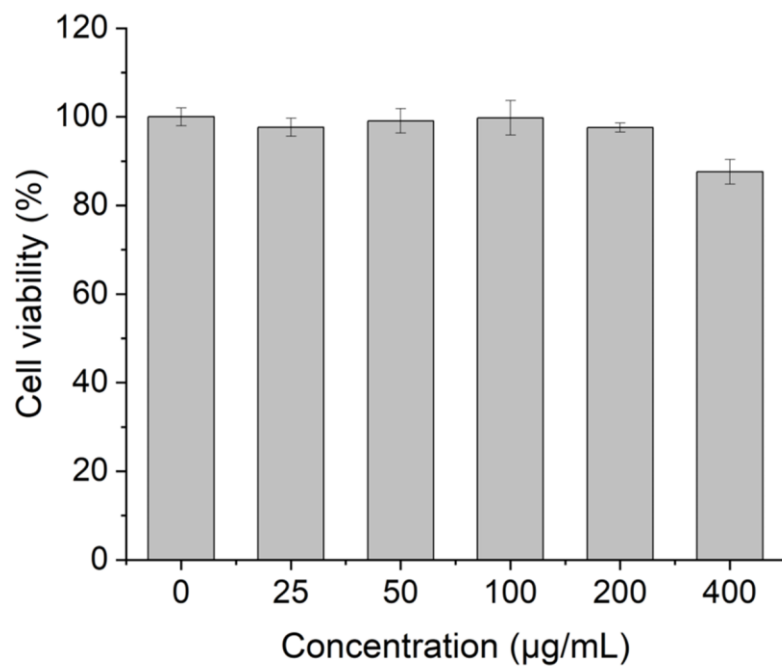

**Figure S3** Cell viability of NIH-3T3 cells treated with different concentrations of MPDA-LZM nanoparticles ( $n=3$ ).

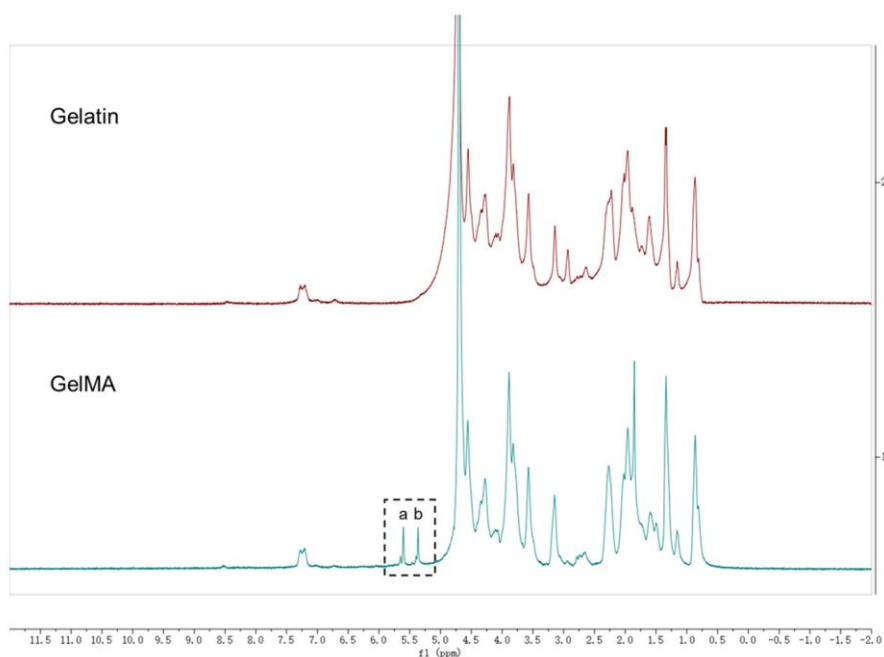

**Figure S4**  $^1\text{H-NMR}$  spectra of gelatin and GelMA. The characteristic peaks of GelMA were labelled as *a* and *b*.

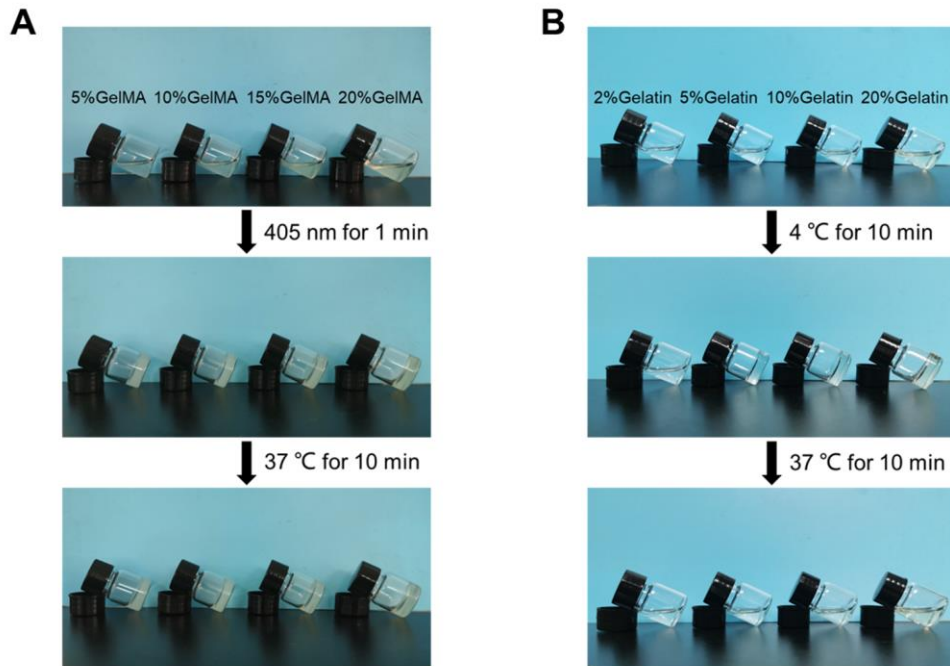

**Figure S5** (A) Photographs of the photo-crosslinking process of different concentrations of GelMA. (B) Photographs of the thermo-reversible gel-sol transition of different concentrations of gelatin.

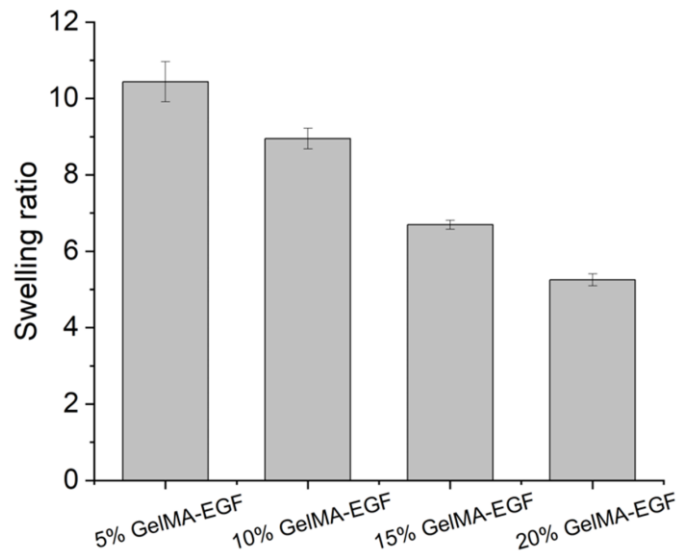

**Figure S6** Swelling ratio of GelMA-EGF hydrogel with different concentrations of GelMA ( $n=3$ ).

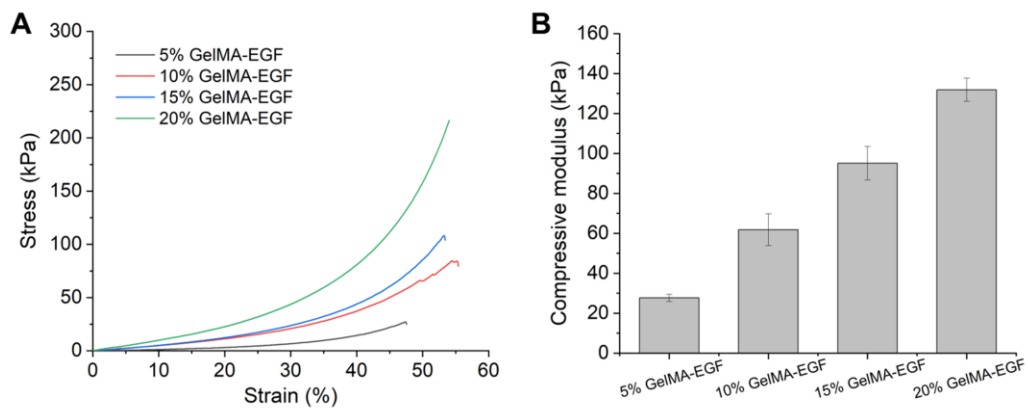

**Figure S7** (A,B) Compressive stress-strain curves and compressive modulus of GelMA-EGF hydrogel with different concentrations of GelMA ( $n=3$ ).

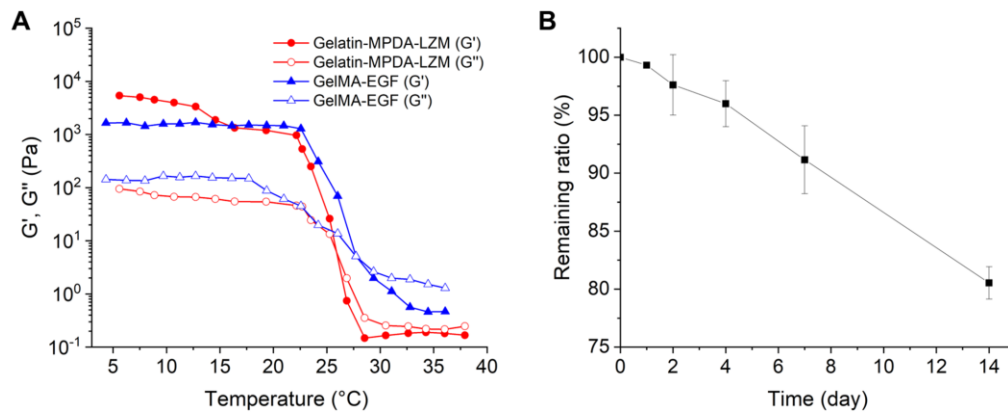

**Figure S8** (A) Rheological properties of different hydrogel dependent on temperature. (B) Degradation behavior of GelMA-EGF hydrogel ( $n=3$ ).

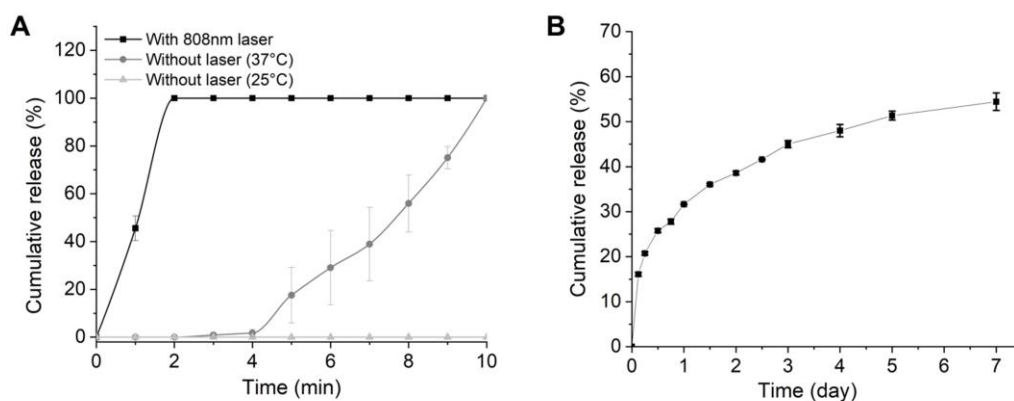

**Figure S9** Release curves of (A) MPDA-LZM nanoparticles and (B) EGF loaded in GelMA-EGF/Gelatin-MPDA-LZM bilayer hydrogel ( $n=3$ ).

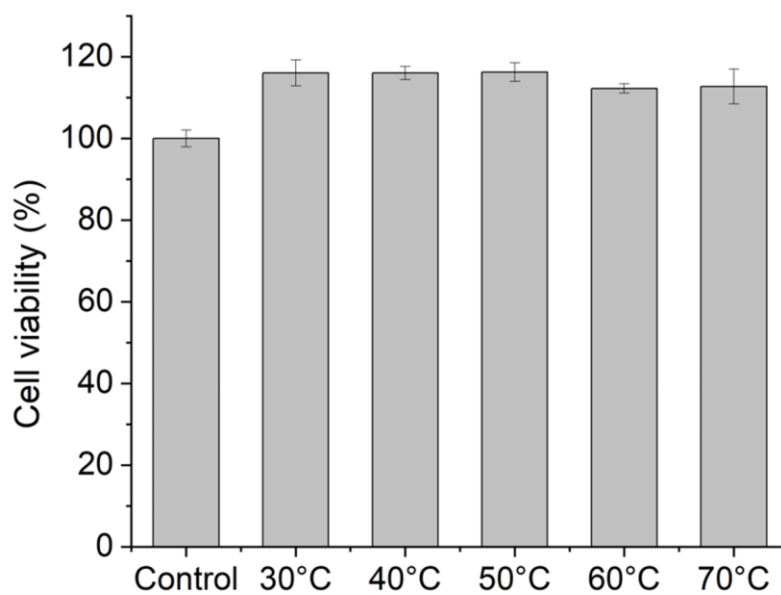

**Figure S10** Cell viability of NIH-3T3 cells treated with different temperature pre-treated EGF ( $n=3$ ).

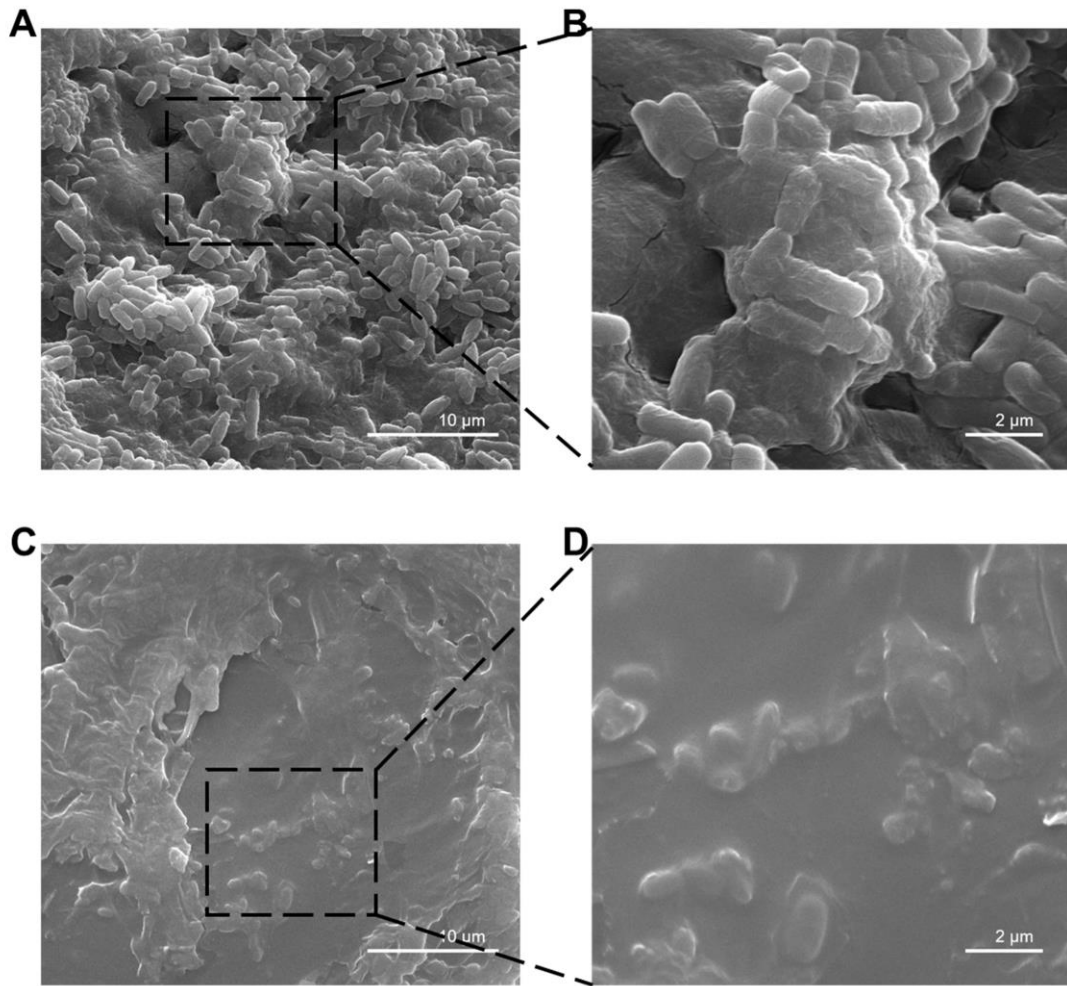

**Figure S11** (A,B) SEM images of wound tissues before PTT (scale bar: 10  $\mu\text{m}$ ; 2  $\mu\text{m}$ ).  
(C,D) SEM images of wound tissues after PTT (scale bar: 10  $\mu\text{m}$ ; 2  $\mu\text{m}$ ).

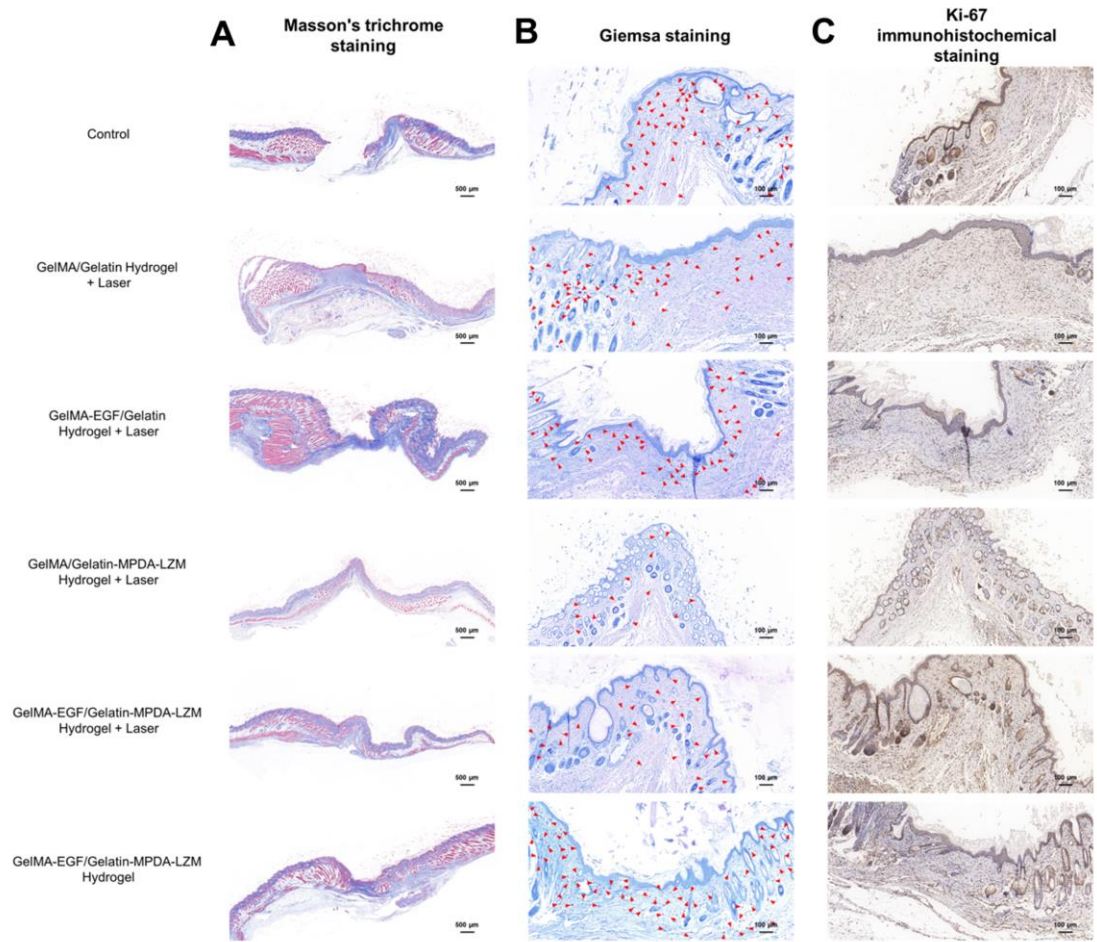

**Figure S12** (A) Representative Masson's trichrome staining images and (B) Giemsa staining images of wound skin tissues (scale bar: 500  $\mu\text{m}$  for Masson's trichrome staining, 100  $\mu\text{m}$  for Giemsa staining). Red arrows represent bacteria. (C) Immunohistochemical staining images of Ki-67 in wound tissues (scale bar: 100  $\mu\text{m}$ ).
